# Supplementary material for: Insight into DNA substrate specificity of PARP1-catalysed DNA poly(ADP-ribosyl)ation
Source: PubMed Central journal article supplement (PMC7048826; doi:10.1038/s41598-020-60631-0), 2020-02-28
Supplement: 41598_2020_60631_MOESM1_ESM.pdf [file 41598_2020_60631_MOESM1_ESM.pdf]

**Insight into DNA substrate specificity of PARP1 catalyzed DNA poly(ADP-ribosylation)**

Elie Matta<sup>1,2,†</sup>, Assel Kiribayeva<sup>3,4,†</sup>, Bekbolat Khassenov<sup>3</sup>, Bakhyt T. Matkarimov<sup>5</sup>, Alexander A. Ishchenko<sup>1,2</sup>

<sup>1</sup>Laboratoire «Intégrité du Génome et Cancers» CNRS, UMR9019, Université Paris-Saclay, F-94805 Villejuif, France

<sup>2</sup>Gustave Roussy, Université Paris-Saclay, F-94805 Villejuif, France

<sup>3</sup>National Center for Biotechnology, Nur-Sultan, 010000, Kazakhstan.

<sup>4</sup>L.N. Gumilyov Eurasian National University, Nur-Sultan, 010000, Kazakhstan.

<sup>5</sup>National Laboratory Astana, Nazarbayev University, Nur-Sultan, 010000, Kazakhstan.

Table S1. Sequences of the oligonucleotides and their duplexes used in this study.

| Name                  | Oligonucleotides sequences and structures                                                                                                                                                                                           |
|-----------------------|-------------------------------------------------------------------------------------------------------------------------------------------------------------------------------------------------------------------------------------|
| S0 <sup>n</sup>       | $  \begin{array}{l}  \text{5' } \overset{32\text{P}}{\text{TCATAGGCTTAGTCGTCATTC}} \overset{n}{\text{GCTGTGCCCTCAACCGAATTCACAAGCCTAGA}} \\  \text{3' } \text{CGACACGGGAGTT GCTTAAGTGTTCCGGATCT}  \end{array}  $                     |
| S1 <sup>n</sup>       | $  \begin{array}{l}  \text{5' } \overset{32\text{P}}{\text{TCATAGGCTTAGTCGTCATTC}} \overset{n}{\text{GCTGTGCCCTCAA}} \overset{P}{\text{CGAATTCACAAGCCTAGA}} \\  \text{3' } \text{CGACACGGGAGTTGGCTTAAGTGTTCCGGATCT}  \end{array}  $ |
| S2 <sup>n</sup>       | $  \begin{array}{l}  \text{5' } \text{GCTGTGCCCTCAA} \overset{32\text{P}}{\text{CGAATTCACAAGCCTAGA}} \\  \text{3' } \overset{P}{\text{CTTACTGCTGATTCGGATACT}} \text{CGACACGGGAGTTGGCTTAAGTGTTCCGGATCT}  \end{array}  $              |
| S2 (S2 <sup>0</sup> ) | $  \begin{array}{l}  \text{5' } \text{GCTGTGCCCTCAA} \overset{32\text{P}}{\text{CGAATTCACAAGCCTAGA}} \\  \text{3' } \overset{P}{\text{CGACACGGGAGTTGGCTTAAGTGTTCCGGATCT}}  \end{array}  $                                           |
| S2 <sup>-1</sup>      | $  \begin{array}{l}  \text{5' } \text{GCTGTGCCCTCAA} \overset{32\text{P}}{\text{CGAATTCACAAGCCTAGA}} \\  \text{3' } \overset{P}{\text{GACACGGGAGTTGGCTTAAGTGTTCCGGATCT}}  \end{array}  $                                            |
| S2 <sup>-3</sup>      | $  \begin{array}{l}  \text{5' } \text{GCTGTGCCCTCAA} \overset{32\text{P}}{\text{CGAATTCACAAGCCTAGA}} \\  \text{3' } \overset{P}{\text{CACGGGAGTTGGCTTAAGTGTTCCGGATCT}}  \end{array}  $                                              |
| S3 <sup>n</sup>       | $  \begin{array}{l}  \text{5' } \text{GCTGTGCCCTCAACCGAATTCACAAGCCTAGA} \\  \text{3' } \overset{P}{\text{CTTACTGCTGATTCGGATACT}} \text{CGACACGGGAGTT GCTTAAGTGTTCCGGATCT}  \end{array}  $                                           |
| S4                    | $  \begin{array}{l}  \text{5' } \overset{32\text{P}}{\text{GCTGTGCCCTCAACCGAATTCACAAGCCTAGA}} \\  \text{3' } \text{CGACACGGGAGTTGGCTTAAGTGTTCCGGATCT}  \end{array}  $                                                               |
| S5                    | $  \begin{array}{l}  \text{5' } \text{GCTGTGCCCTCAA} \overset{32\text{P}}{\text{CGAATTCACAAGCCTAGA}} \\  \text{3' } \text{CGACACGGGAGTTGGCTTAAGTGTTCCGGATCT}  \end{array}  $                                                        |
| S6                    | $  \begin{array}{l}  \text{5' } \text{GCTGTGCCCT} \overset{32\text{P}}{\text{AAGCGAATTCACAAGCCTAGA}} \\  \text{3' } \text{CGACACGGGAGTTGGCTTAAGTGTTCCGGATCT}  \end{array}  $                                                        |
| S7                    | $  \begin{array}{l}  \text{5' } \text{GCTGTGCCCTCAAC} \overset{32\text{P}}{\text{CGAATTCACAAGCCTAGA}} \\  \text{3' } \overset{P}{\text{CGACACGGGAGTTG-GCTTAAGTGTTCCGGATCT}}  \end{array}  $                                         |
| S8                    | $  \begin{array}{l}  \text{5' } \text{GCTGTGCCCTCAACC} \overset{32\text{P}}{\text{AATTCACAAGCCTAGA}} \\  \text{3' } \text{CGACACGGGAGTTGGCTTAAGTGTTCCGGATCT}  \end{array}  $                                                        |
| S9                    | $  \begin{array}{l}  \text{5' } \text{GCTGTGCCCTCAACCGAATT} \overset{32\text{P}}{\text{ACAAGCCTAGA}} \\  \text{3' } \text{CGACACGGGAGTTGGCTTAAGTGTTCCGGATCT}  \end{array}  $                                                        |
| S10                   | $  \begin{array}{l}  \text{5' } \text{GCTGTGCCCTCAACCGAATTCAC} \overset{32\text{P}}{\text{AGCCTAGA}} \\  \text{3' } \text{CGACACGGGAGTTGGCTTAAGTGTTCCGGATCT}  \end{array}  $                                                        |
| S11                   | $  \begin{array}{l}  \text{5' } \text{GCTGTGCCCTCAA} \overset{32\text{P}}{\text{AATTCACAAGCCTAGA}} \\  \text{3' } \text{CGACACGGGAGTTGGCTTAAGTGTTCCGGATCT}  \end{array}  $                                                          |
| S12                   | $  \begin{array}{l}  \text{5' } \text{GCTGTGCCCTCAA} \overset{32\text{P}}{\text{CACAAGCCTAGA}} \\  \text{3' } \text{CGACACGGGAGTTGGCTTAAGTGTTCCGGATCT}  \end{array}  $                                                              |
| S13                   | $  \begin{array}{l}  \text{5' } \text{GCTGTGCCCTCAA} \overset{32\text{P}}{\text{AGCCTAGA}} \\  \text{3' } \text{CGACACGGGAGTTGGCTTAAGTGTTCCGGATCT}  \end{array}  $                                                                  |
| S14                   | $  \begin{array}{l}  \text{5' } \text{GCTGTGCCCTCAACCGAA} \overset{P}{\text{TCACAAGCCTAGA}} \\  \text{3' } \text{CGACACGGGAGTTGGCTTAAGTGTTCCGGATCT}  \end{array}  $                                                                 |
| S15                   | $  \begin{array}{l}  \text{5' } \text{GCTGTGCCCTCAA} \overset{32\text{P}}{\text{CGAATTCACAAGCCTAGAGTTACATTAGCAGATACG}} \\  \text{3' } \text{CGACACGGGAGTTGGCTTAAGTGTTCCGGATCTCAATGTAATCGTCTATGC}  \end{array}  $                    |
| S16                   | $  \begin{array}{l}  \text{5' } \text{GCTGTGCCCTCAACCGAAT} \overset{32\text{P}}{\text{CACAAGCCTAGAGTTACATTAGCAGATACG}} \\  \text{3' } \text{CGACACGGGAGTTGGCTTAAGTGTTCCGGATCTCAATGTAATCGTCTATGC}  \end{array}  $                    |
| S17                   | $  \begin{array}{l}  \text{5' } \text{GCTGTGCCCTCAACCGAATT} \overset{32\text{P}}{\text{CACAAGCCTAGAGTTACATTAGCAGATACG}} \\  \text{3' } \text{CGACACGGGAGTTGGCTTAA-GTGTTCGGATCTCAATGTAATCGTCTATGC}  \end{array}  $                   |
| S18                   | $  \begin{array}{l}  \text{5' } \text{GCTGTGCCCTCAACCGAATTCAC} \overset{32\text{P}}{\text{AGCCTAGAGTTACATTAGCAGATACG}} \\  \text{3' } \text{CGACACGGGAGTTGGCTTAAGTGTTCCGGATCTCAATGTAATCGTCTATGC}  \end{array}  $                    |
| S19                   | $  \begin{array}{l}  \text{5' } \overset{32\text{P}}{\text{GCTGTGCCCTCAACCGAATTCACAAGCCTAGA}} \\  \text{3' } \text{CGACACGGGAGTTGGCTTAAGTGTTCCGGATCT} \\  \text{tt}  \end{array}  $                                                 |
| S20                   | $  \begin{array}{l}  \text{5' } \overset{tt}{\text{GCTGTGCCCTCAA}} \overset{32\text{P}}{\text{CGAATTCACAAGCCTAGA}} \overset{t}{\text{}} \\  \text{3' } \text{CGACACGGGAGTTGGCTTAAGTGTTCCGGATCT} \\  \text{P-}  \end{array}  $       |
| S21                   | $  \begin{array}{l}  \text{5' } \overset{32\text{P}}{\text{TCATAGGCTTAGTCGTCATTCGCTGTGCCCTCAACCGAATTCACAAGCCTAGA}} \\  \text{3' } \text{CGACACGGGAGTTGGCTTAAGTGTTCCGGATCT}  \end{array}  $                                          |
| S22                   | $  \begin{array}{l}  \text{5' } \text{GCTGTGCCCTCAACCGAATTCACAAGCCTAGA} \\  \text{3' } \overset{P}{\text{CTTACTGCTGATTCGGATACTCGACACGGGAGTTGGCTTAAGTGTTCCGGATCT}}  \end{array}  $                                                   |

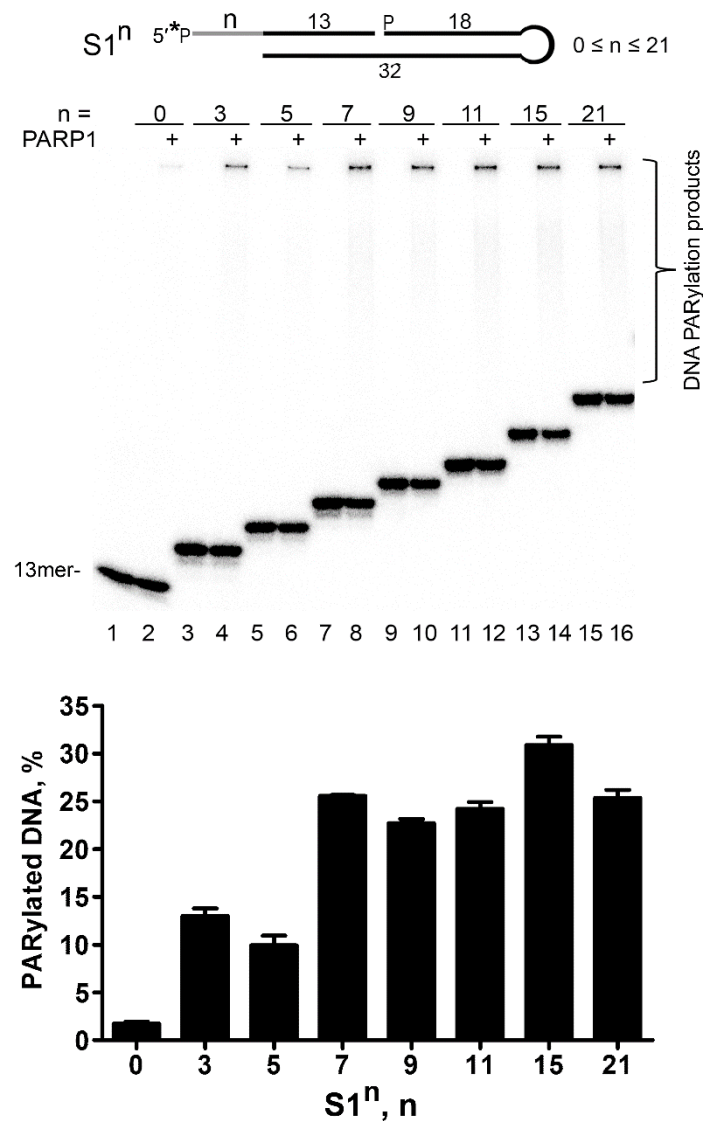

**Figure S1. ADP-ribosylation of S1<sup>n</sup> DNA duplexes containing 5'-otherhangs by PARP1 at a non-saturating concentration of NAD<sup>+</sup>.** [<sup>32</sup>P]labelled S1<sup>n</sup> DNA duplexes (20 nM) were combined with 50 nM PARP1 in the presence of 50 μM NAD<sup>+</sup> for 15 min at 37°C under standard reaction conditions. The data on PARP-catalysed formation of DNA ADP-ribosylation products are presented as mean ± SD from three independent experiments.



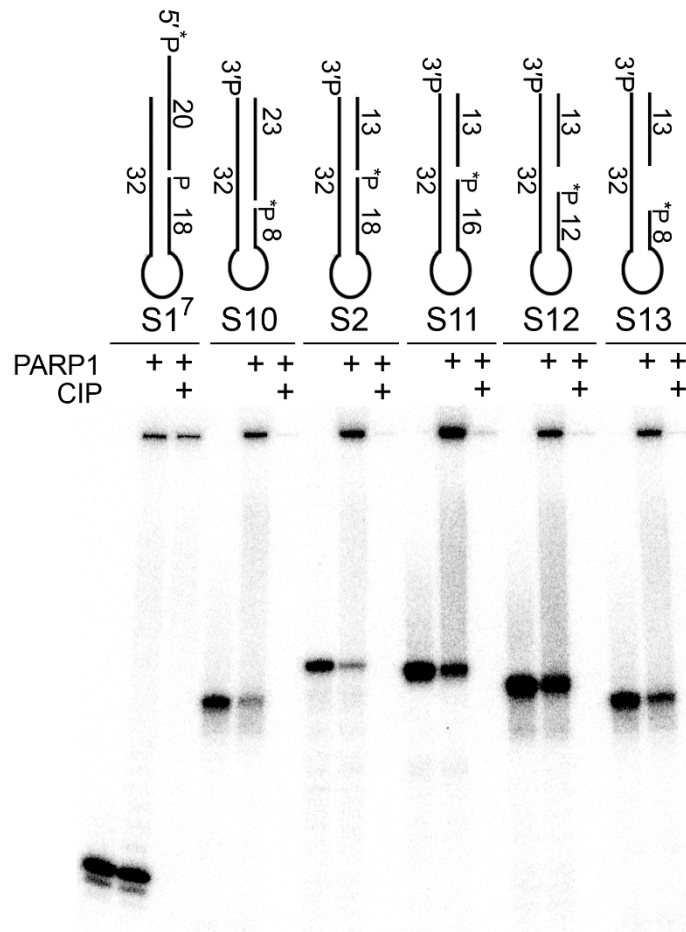

**Figure S3. Validation of PARP1-dependent PARylation of 3'-phosphorylated DSB termini of DNA substrates S2 and S10-13 by CIP-induced dephosphorylation.** After incubation with PARP1, the 5'-[<sup>32</sup>P]labelled DNA samples were heated for 10 min at 85°C, and the resulting [<sup>32</sup>P]labelled DNA PARylation products were further incubated with 10 U of CIP for 30 min at 37°C.

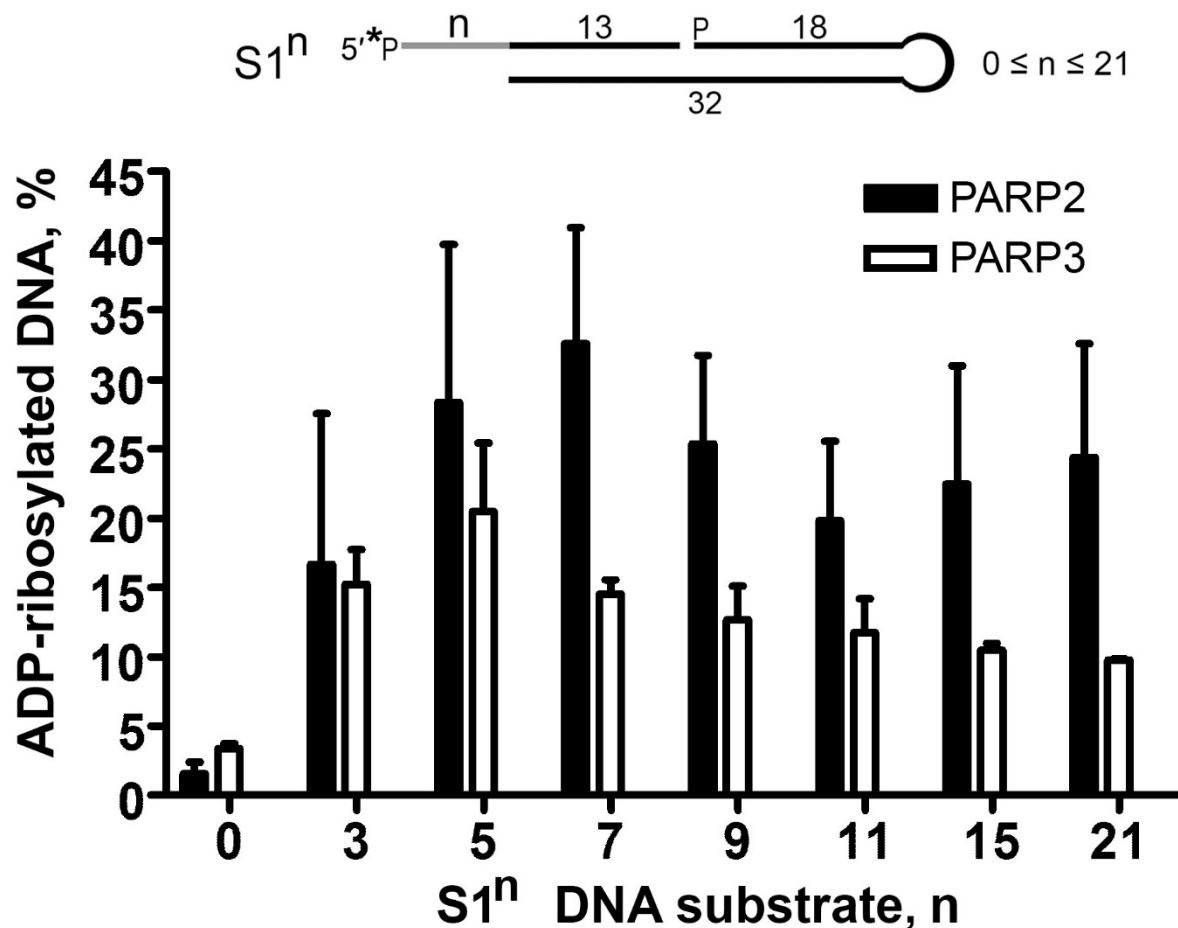

**Figure S4. ADP-ribosylation of S1<sup>n</sup> DNA duplexes containing 5'-otherhangs by PARP2 and PARP3.** [<sup>32</sup>P]labelled S1<sup>n</sup> DNA duplexes (20 nM) were combined with 50 nM PARP3 or PARP2 in the presence of 1 mM NAD<sup>+</sup> in ADPR buffer (20 mM HEPES-KOH pH 7.6, 50 mM KCl, 5 mM MgCl<sub>2</sub>, 1 mM DTT and 100 μg/mL BSA). The mixture was incubated for 10 min (PARP3) or 30 min (PARP2) at 37°C. The data on PARP-catalysed formation of DNA ADP-ribosylation products are presented as mean ± SD from three independent experiments.
